# Supplementary material for: Alzheimer’s protection effect of A673T mutation may be driven by lower Aβ oligomer binding affinity
Source: PubMed Central journal article supplement — J Neurochem. 2020 Oct 25;157(4):1316–30. doi: 10.1111/jnc.15212 (PMC8246829; doi:10.1111/jnc.15212), 2020-10-25
Supplement: JNC-157-1316-s001.pdf [file JNC-157-1316-s001.pdf]

## **Alzheimer's Protection Effect of A673T Mutation May Be Driven by Lower A $\beta$ Oligomer Binding Affinity**

Colleen S. Limegrover<sup>1</sup>, Harry LeVine III<sup>2</sup>, Nicholas J. Izzo<sup>1</sup>, Raymond Yurko<sup>1</sup>, Kelsie Mozzoni<sup>1</sup>, Courtney Rehak<sup>1</sup>, Kelsey Sadlek<sup>1</sup>, Hank Safferstein<sup>1</sup>, Susan M. Catalano<sup>1\*</sup>

<sup>1</sup>From Cognition Therapeutics Inc., Pittsburgh, PA, 15203

<sup>2</sup>Sanders-Brown Center on Aging, University of Kentucky, KY 40536-0230

Running title: *Mutant oligomers have lower synaptic binding affinity than wt*

\*To whom correspondence should be addressed: Susan Catalano, Ph.D., Cognition Therapeutics Inc., 2403 Sidney Street, Suite 261, Pittsburgh, PA 15203, Tel: (412) 481-2210; Fax: (412) 481-2216; Email: [scatalano@cogrx.com](mailto:scatalano@cogrx.com)

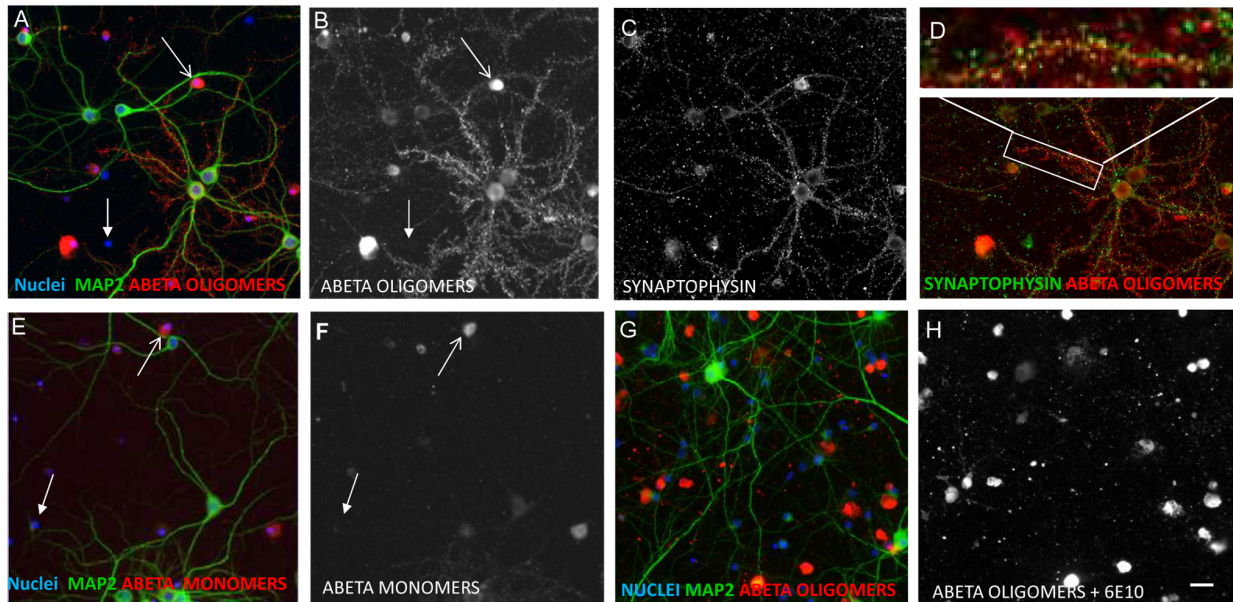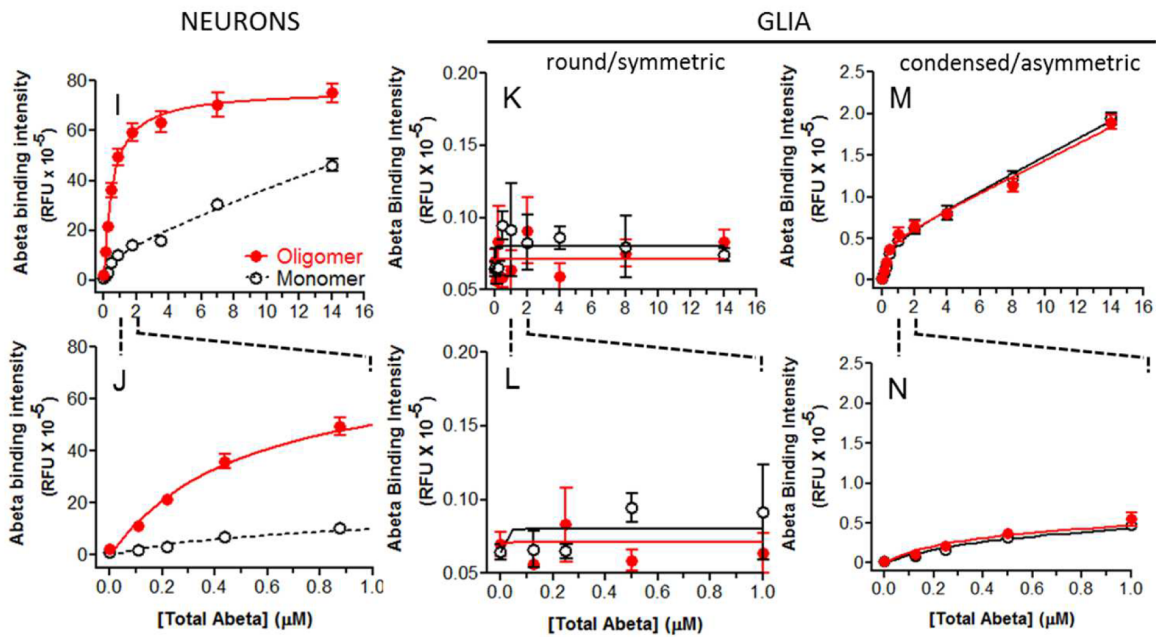

**Supplemental Figure 1 (Figure 6 from Izzo et al. 2014a). Aβ oligomers bind to a single saturable receptor site on neuronal synaptic puncta. A,B.** Wild-type Aβ 1-42 oligomers bind to some but not all neurons when added to cultures for 60 minutes (total Aβ concentration = 440 nM, visualized with 6E10 immunolabeling). A subset of neurons (immunopositive for MAP2,

green) exhibit punctate postsynaptic oligomer binding (red) along their neurites;  $37\% \pm 3\%$  of these puncta colocalize with presynaptic terminals immunolabeled for synaptophysin (**C,D**). Nuclei (DAPI +, blue) of several non-neuronal cells (glia, MAP2-negative) exhibit A $\beta$  binding to the cell body. **B,F,H**. Immunolabeling of A $\beta$ , alone, is shown for clarity. **E,F**. Fresh A $\beta$  1-42 monomers, added to cells with identical concentrations and conditions, is characterized by very low intensity punctate labeling on neurites and labeling of neuron and glia cell bodies. **G,H**. 6E10 (monoclonal antibody to Abeta 3-8) added to cultures prior to oligomers blocks binding of A $\beta$  oligomers to neurite puncta but not to cell bodies of neurons or glia. **I**. Binding isotherms for A $\beta$  oligomers (red closed circles) and fresh A $\beta$  monomer (black open circles; treatment for 60 minutes with 44 nM- 14  $\mu$ M total A $\beta$  concentration) indicate that oligomer binding to neuronal puncta fits a single-site, saturable model ( $K_d = 518 \pm 41$  nM). Binding of fresh monomer fits a two-site model with a high affinity site ( $412 \pm 48$  nM) and a second non-saturable binding site. **J**. Same data as **I**, expanded to show concentrations used for competition binding studies (440 nM total A $\beta$  concentration); at these low concentrations binding intensity of oligomers to neuronal synaptic puncta is five-fold higher than with monomer. **K,L**. Binding of synthetic A $\beta$  oligomers and fresh monomer to glial cells with round/symmetric nuclear morphology (closed arrowheads in **B, F**) is not above background levels (zero A $\beta$  concentration in all graphs). **M,N**. Binding of synthetic A $\beta$  oligomers and fresh monomer to glia with condensed/asymmetric nuclear morphology (open arrowheads in **B,F**) fits a two site model with a high affinity site ( $K_d = 289 \pm 150$  nM) and a second non-saturating site ( $K_d > 1$  M). Scale bars = 20 $\mu$ m.

### **Supplemental References:**

Izzo N. J., Staniszewski A., To L., Fa M., Teich A. F., Saeed F., Wostein H., et al. (2014a) Alzheimer's therapeutics targeting amyloid beta 1-42 oligomers I: Abeta 42 oligomer binding to specific neuronal receptors is displaced by drug candidates that improve cognitive deficits. *PLoS One* **9**, e111898.
